1 **Harnessing a Novel P450 Fatty Acid Decarboxylase from *Macrococcus***  
2 ***caseolyticus* for Microbial Biosynthesis of Odd Chain Terminal Alkenes**

3

4 Jong-Won Lee<sup>1,2,§</sup>, Narayan P. Niraula<sup>3,§,#</sup>, and Cong T. Trinh<sup>1,2,3,\*</sup>

5

6 <sup>1</sup>Bredesen Center for Interdisciplinary Research and Graduate Education, University of  
7 Tennessee, Knoxville, TN, USA

8 <sup>2</sup>Center for Bioenergy Innovation, Oak Ridge National Laboratory, Oak Ridge, TN, USA

9 <sup>3</sup>Department of Chemical and Biomolecular Engineering, University of Tennessee, Knoxville,  
10 TN, USA

11

12 <sup>§</sup>Equal contributions

13 <sup>\*</sup>Corresponding author. Email: [ctrinh@utk.edu](mailto:ctrinh@utk.edu)

14

15 <sup>#</sup>Current address: Pfizer Inc., Kalamazoo, MI

16

17

18 **Running title:** Harnessing OleT<sub>MC</sub> for terminal alkene synthesis in *E. coli*

19

20

21

22

## 23 ABSTRACT

24 Alkenes are industrially important platform chemicals with broad applications. In this  
25 study, we report a microbial conversion route for direct biosynthesis of medium and long chain  
26 terminal alkenes from fermentable sugars by harnessing a novel P450 fatty acid (FA)  
27 decarboxylase from *Macrococcus caseolyticus* (OleT<sub>MC</sub>). We first characterized OleT<sub>MC</sub> and  
28 demonstrated its *in vitro* H<sub>2</sub>O<sub>2</sub>-independent activities towards linear and saturated C10:0-C18:0  
29 FAs, with the highest activity for C16:0 and C18:0 FAs. Combining protein homology  
30 modeling, *in silico* residue mutation analysis, and docking simulation with direct experimental  
31 evidence, we elucidated the underlying mechanism for governing the observed substrate  
32 preference of OleT<sub>MC</sub>, which depends on the size of FA binding pocket, not the catalytic site.  
33 Next, we engineered the terminal alkene biosynthesis pathway, consisting of an engineered *E.*  
34 *coli* thioesterase (TesA\*) and OleT<sub>MC</sub>, and introduced this pathway into *E. coli* for direct  
35 terminal alkene biosynthesis from glucose. The recombinant strain *E. coli* EcNN101 produced  
36 a total of  $17.78 \pm 0.63$  mg/L odd-chain terminal alkenes, comprising of  $0.9\% \pm 0.5\%$  C11  
37 alkene,  $12.7\% \pm 2.2\%$  C13 alkene,  $82.7\% \pm 1.7\%$  C15 alkene, and  $3.7\% \pm 0.8\%$  C17 alkene,  
38 and a yield of  $0.87 \pm 0.03$  (mg/g) on glucose after 48 h in baffled shake flasks. To improve the  
39 terminal alkene production, we identified and overcame the electron transfer limitation in  
40 OleT<sub>MC</sub>, by introducing a two-component redox system, consisting of a putidaredoxin  
41 reductase CamA and a putidaredoxin CamB from *Pseudomonas putida*, into EcNN101, and  
42 demonstrated the terminal alkene production increased ~2.8 fold after 48 h. Overall, this study  
43 provides a better understanding of the function of P450 FA decarboxylases and helps guide  
44 future protein and metabolic engineering for enhanced microbial production of target designer  
45 alkenes in a recombinant host.

46

47 **Keywords:** P450 decarboxylase; terminal alkene; OleT; protein homology modeling; alanine

48 scan; residue scan; MOE; CamA; CamB; *Escherichia coli*; *Macrococcus caseolyticus*.

49

50

## 51 1. INTRODUCTION

52 Alkenes (or olefins) are industrially important platform chemicals used to manufacture  
53 polymers, lubricants, surfactants, and coatings (1). Alkenes are currently produced by the well-  
54 established chemical conversion route (e.g., hydrogen cracking) using petroleum-based  
55 feedstocks that are neither renewable nor sustainable (2, 3). In recent years, there is great  
56 interest in developing microbial conversion routes to produce alkenes from renewable and  
57 sustainable sources, such as biomass-derived fermentable sugars (4-10).

58 Various species are known to produce alkenes endogenously via decarbonylation of  
59 aldehydes (11-13), decarboxylation of FAs (14), condensation of unsaturated polyenes (15),  
60 and oxidation of FAs (7, 8). Various types of alkenes can be synthesized including alkadienes  
61 (16, 17), terminal alkenes (or 1-alkenes) (4, 6-8) as well as non-terminal alkenes (5), depending  
62 on enzyme types and substrates employed. To date, a number of different classes of enzymes  
63 have been reported to synthesize terminal alkenes including a P450 FA  
64 decarboxylase/peroxygenase (OleT, belonging to the CYP152 family) (4), a type-I polyketide  
65 synthase-like enzyme (CurM/Ols) (6), a desaturase-like enzyme (UndB) (7), and a non-heme  
66 oxidase (UndA) (8). These enzymes take various substrates (e.g., FAs, fatty aldehydes, or FA  
67 thioesters) to produce terminal alkenes with different carbon chain lengths. For instance, OleT,  
68 CurM/Ols, and UndB are capable of synthesizing (C<sub>6</sub>-C<sub>12</sub>) medium-chain and (> C<sub>12</sub>) long-  
69 chain alkenes while UndA only produces medium chain length alkenes. The diversity of these  
70 enzyme specificities can potentially offer unique opportunities to develop microbial cell  
71 factories to engineer designer olefins for tailored applications.

72 Among the putative P450 FA decarboxylases/peroxygenases discovered, OleT<sub>JE</sub> is the  
73 most well-characterized enzyme that is capable of using either H<sub>2</sub>O<sub>2</sub>-dependent or  
74 H<sub>2</sub>O<sub>2</sub>-independent (O<sub>2</sub>-dependent) mechanisms for alkene biosynthesis (4, 16, 18, 19). OleT<sub>JE</sub>  
75 has broad substrate specificity for C<sub>12:0</sub>-C<sub>20:0</sub> FAs *in vitro*, with the highest towards C<sub>12:0</sub>

76 FA in the presence of redox partner proteins and C14:0 FA in the H<sub>2</sub>O<sub>2</sub>-dependent system (16).  
77 For the low-cost, large-scale production of terminal alkenes, the use of H<sub>2</sub>O<sub>2</sub>-independent  
78 decarboxylases (e.g., OleT<sub>JE</sub>) is likely favorable by avoiding the external supply and  
79 cytotoxicity of H<sub>2</sub>O<sub>2</sub>. Thus, harnessing the enzyme library of H<sub>2</sub>O<sub>2</sub>-independent  
80 decarboxylases are important for the microbial production of terminal alkenes from biomass-  
81 derived sugars.

82 In this study, we expanded the library of unique OleTs for terminal alkene biosynthesis  
83 by characterizing a novel P450 FA decarboxylase OleT<sub>MC</sub> derived from *Macrococcus*  
84 *caseolyticus* for its catalytic functions. We employed protein homology modeling, *in silico*  
85 residue mutation analysis, and docking simulation to elucidate the underlying mechanism of  
86 fatty acid specificity of OleT<sub>MC</sub>. Furthermore, we harnessed this OleT<sub>MC</sub> to engineer a terminal  
87 alkene biosynthesis pathway in *E. coli* for direct conversion of fermentable sugars into medium  
88 and long chain terminal alkenes (Figure 1). We discovered that electron transfer was the rate  
89 limiting step of alkene biosynthesis in the recombinant *E. coli*. This limitation could be  
90 alleviated by expressing the redox system CamA/B from *Pseudomonas putida* in the  
91 recombinant *E. coli*, resulting in enhanced alkene production.

92

## 93 **2. RESULTS AND DISCUSSION**

### 94 **2.1 Genome mining of OleT decarboxylases for terminal alkene biosynthesis**

95 To identify the putative H<sub>2</sub>O<sub>2</sub>-independent P450 FA decarboxylases, we performed a genome  
96 mining, a combination of the sequence alignment and phylogenetic analysis, using the protein  
97 sequence of OleT<sub>JE</sub> (ADW41779) as a template. The sequences of the CYP152 P450 enzyme  
98 family (4) were first aligned to select the candidates that have the conserved catalytic site  
99 residues Phe79, His85, and Arg245 like OleT<sub>JE</sub> (20). Among the 29 decarboxylase candidates,  
100 we found that three P450 enzymes from *M. caseolyticus* (WP\_041635889.1), *Corynebacterium*

101 *efficiens* (WP\_011075937.1), and *Kocuria rhizophila* (WP\_012399225.1) have the conserved  
102 catalytic site residues (Supplementary Figure S1). Based on the phylogenetic analysis, we  
103 found that the P450 enzyme of *M. caseolyticus* (WP\_041635889.1) is the closest ortholog to  
104 OleT<sub>JE</sub> with the highest amino acid identity (~60%) (Figure 2 and Supplementary Figure S1).  
105 Thus, we chose the P450 from *M. caseolyticus*, named OleT<sub>MC</sub>, for further characterization.

106

## 107 **2.2 *In vitro* characterization of OleT<sub>MC</sub>**

108 The expression of OleT<sub>MC</sub> in BL21 ( $\lambda$ DE3) pNN33 was confirmed *in vivo* with reddish cell  
109 cultures due to the heme-containing OleT<sub>MC</sub> and *in vitro* by a sodium dodecyl sulfate  
110 polyacrylamide gel electrophoresis (SDS-PAGE) and spectrophotometric analysis  
111 (Supplementary Figure S2). After protein isolation, we performed the *in vitro* enzyme assay to  
112 examine the H<sub>2</sub>O<sub>2</sub>-independent decarboxylase activity of OleT<sub>MC</sub> towards linear, saturated  
113 FAs. The result shows that OleT<sub>MC</sub> could convert C10:0-C18:0 FAs to the corresponding odd  
114 chain terminal alkenes without H<sub>2</sub>O<sub>2</sub> as an oxidant, confirmed by GC/MS (Supplementary  
115 Figure S3). Under the H<sub>2</sub>O<sub>2</sub>-independent (O<sub>2</sub>-dependent) conditions, OleT<sub>MC</sub> showed the  
116 highest specific activity towards C18:0 FA ( $1.13 \pm 0.09 \mu\text{M}/\text{min}/\text{mg}$ ) and the lowest specific  
117 activity towards C10:0 FA ( $0.17 \pm 0.04 \mu\text{M}/\text{min}/\text{mg}$ ) (Figure 3A). OleT<sub>MC</sub> exhibited almost the  
118 same specific activity for C12:0 FA ( $0.62 \pm 0.10 \mu\text{M}/\text{min}/\text{mg}$ ) and C14:0 FA ( $0.66 \pm 0.04$   
119  $\mu\text{M}/\text{min}/\text{mg}$ ). We did not observe the activity of OleT<sub>MC</sub> for < C10:0 FAs. The FA specificity  
120 of OleT<sub>MC</sub> can be ranked as follows: C18:0 > C16:0 > C14:0  $\geq$  C12:0 > C10:0. Taken  
121 altogether, OleT<sub>MC</sub> is a potential FA decarboxylase for developing the terminal alkene  
122 biosynthesis pathway in recombinant hosts (e.g., *E. coli*) for direct conversion of fermentable  
123 sugars to terminal alkenes.

124

## 125 **2.3 Elucidate the underlying mechanism governing the substrate specificity of OleT<sub>MC</sub>**

126           Currently, it is not well understood why different FA decarboxylases have different  
127 substrate specificities. For instance, OleT<sub>JE</sub> prefers C12:0-C14:0 FAs to longer ones (16, 20)  
128 while OleT<sub>MC</sub> favors C16:0-C18:0 FAs more than shorter ones (this study). To better  
129 understand the underlying mechanism for governing the observed substrate preference of  
130 OleT<sub>MC</sub>, we focused on analyzing its protein structure, using protein homology modeling, *in*  
131 *silico* residue mutation analysis, and docking simulation in combination with direct  
132 experimental evidence.

133

### 134           **2.3.1 Analysis of the effect of catalytic site on the substrate specificity of OleT<sub>MC</sub>.**

135           Since OleT<sub>MC</sub> and OleT<sub>JE</sub> have different substrate preferences, we first tested whether structural  
136 difference of their catalytic sites might exist and play a role. To do this, we built a 3D structure  
137 of OleT<sub>MC</sub> using the version 2015.10 Molecular Operating Environment (MOE) software (21),  
138 based on the best-hit crystallographic structure of the substrate-bound (C20:0, arachidic acid)  
139 form of OleT<sub>JE</sub> (PDB:4L40 (19), ~60% amino acid identity) as a template. The Ramachandran  
140 plot of OleT<sub>MC</sub> showed less than 0.5% of the residues to be in disallowed regions  
141 (Supplementary Figure S4). Next, we superposed the heme-bound 3D structures of OleT<sub>MC</sub> and  
142 OleT<sub>JE</sub> and found that they look almost identical (Figure 4A) with a very similar catalytic site  
143 configuration (Figure 4B). This result suggests that other factors, not the catalytic site, might  
144 be responsible for modulating the substrate specificities of OleT<sub>MC</sub> and OleT<sub>JE</sub>. This  
145 observation concurs with recent experimental evidence that single site directed mutations on  
146 the catalytic site residues, including Phe79, His85, and Arg245, did not improve the catalytic  
147 activity or change the substrate preference of OleT<sub>JE</sub> (20, 22, 23). Further, a recent molecular  
148 dynamics study suggests several residues of OleT<sub>JE</sub> interacting with FA could significantly  
149 contribute to the substrate binding free energy (24).

150

151           **2.3.2 Effect of binding free energy of *OleT<sub>MC</sub>* on its substrate preferences.** To examine  
152 whether the binding free energy of FA-bound *OleT<sub>MC</sub>* might affect its substrate specificity, we  
153 docked *OleT<sub>MC</sub>* with various FAs (C10:0-C18:0) in MOE. Our result shows that the FA-bound  
154 *OleT<sub>MC</sub>* complexes exhibited the interactions between FAs and *OleT<sub>MC</sub>* where the binding  
155 pocket of *OleT<sub>MC</sub>* contains greasy residues such as alanine (Ala, A), valine (Val, V), leucine  
156 (Leu, L), isoleucine (Ile, I), proline (Pro, P), phenylalanine (Phe, F) (Supplementary Figures  
157 S5 and S6). The binding free energies of different FA-bound *OleT<sub>MC</sub>* complexes increase with  
158 shorter chain FAs (Figure 3B). Remarkably, there is a strong linear correlation ( $R^2 = 0.92$ )  
159 between the binding free energies and specific activities of *OleT<sub>MC</sub>* for various FAs (Figure  
160 3C).

161  
162           **2.3.3 Residues at the tail of FA binding site are critical for determining the substrate**  
163 ***specificity of *OleT<sub>MC</sub>*.*** To identify the critical residues of the binding pocket that might affect  
164 the substrate specificity of *OleT<sub>MC</sub>*, we first performed the alanine scan using the “alanine scan”  
165 tool in MOE. We scanned a set of 21 residues located at the FA docking sites of FA-bound  
166 *OleT<sub>MC</sub>* complexes (Supplementary Figure S5A) by substituting each candidate with Ala  
167 residue. Regardless of C10:0-C18:0 FAs, we found that the mutation at P72A or I171A  
168 increased the stability, while F174A or F296A decreased the stability (Figure 3D). In contrast,  
169 the mutation at I177A or V294A showed different stabilities for different FAs. Based on this  
170 first round of alanine scan and stability analysis, we narrowed the initial large set of 21  
171 candidate residues to the 6 promising candidates, including P72, I171, F174, I177, F296 or  
172 V294, that might have a significant role for the substrate specificity of *OleT<sub>MC</sub>*.

173           Next, we performed a comprehensive residue scan for these 6 candidate residues using  
174 the “residue scan” tool in MOE. Specifically, we generated a set of 54 *OleT<sub>MC</sub>* variants by  
175 systematically substituting each candidate with nine different hydrophobic residues including



176 glycine (Gly, G), Ala, Val, Leu, Ile, Pro, Phe, methionine (Met, M), and tryptophan (Trp, W)  
177 and performed the stability analysis (Supplementary Figures S7A-F). By determining the  
178 largest  $\Delta$ stability differences between C18:0 FA-bound and C10:0 FA-bound OleT<sub>MC</sub>  
179 complexes for each OleT<sub>MC</sub> variant, we could select a list of the top five mutants, including  
180 I177W, P72M, F296W, I177F, and P72F (Supplementary Figure S7G), for detail structure  
181 analysis. Interestingly, all these five OleT<sub>MC</sub> variants, selected by combination of alanine and  
182 residue scans, had the mutated residues located at the tail of the FA binding pocket (Figures  
183 4C-4H).

184 To determine whether the top 5 OleT<sub>MC</sub> variants are responsible for substrate  
185 preferences of OleT<sub>MC</sub>, we next generated their 3D structures in MOE, followed by docking  
186 simulation of these variants with various FAs (C10:0-C18:0). Our result shows that the two  
187 variants, OleT<sub>MC</sub> P72M and F296W, significantly shifted substrate preferences while the other  
188 variants, OleT<sub>MC</sub> I177W, I177F, and P72F, did not (Figure 4B). For the OleT<sub>MC</sub> F296W model,  
189 we observed that the correct docking poses, whose Arg246 should interact with the carboxylic  
190 functional group of FAs via hydrogen bonding, were no longer detected with C16:0 and C18:0  
191 FAs. It has the lowest  $\Delta G_{\text{bind}}$  of -8.43 kcal/mol with C14:0 FA and the highest  $\Delta G_{\text{bind}}$  of -6.72  
192 kcal/mol with C10:0 FA. Likewise, OleT<sub>MC</sub> P72M showed the lowest  $\Delta G_{\text{bind}}$  of -8.23 kcal/mol  
193 with C14:0 FA and the highest  $\Delta G_{\text{bind}}$  of -6.18 kcal/mol with C18:0 FA. These results suggest  
194 that P72M and F296W variants can shift the substrate preferences from longer to shorter FAs.

195

196 **2.3.4 Reconfiguration of the binding pocket is responsible for shifting the substrate**  
197 **preference in OleT<sub>MC</sub> variants.** To elucidate the underlying mechanism for shifting the  
198 substrate preference of OleT<sub>MC</sub>, we compared the structures of OleT<sub>MC</sub> variants, including  
199 I177W (Figure 4D), P72M (Figure 4E), F296W (Figure 4F), I177F (Figure 4G), and P72F  
200 (Figure 4H), and its wildtype (Figure 4C). Our result shows that the disruption of the FA

201 binding pockets affected substrate preferences of OleT<sub>MC</sub> P72M (Figure 4E) and F296W  
202 (Figure 4F). Specifically, they interfered with the access and docking of the longer C16:0-  
203 C18:0 FAs. Furthermore, since OleT<sub>MC</sub> F296W could not dock C16:0 and C18:0 FAs but  
204 OleT<sub>MC</sub> F72M could, it implies that the size of mutated residue (e.g. Trp (W) having a larger  
205 size than Met (M)) can play a significant role in changing the substrate specificity of OleT<sub>MC</sub>.

206 Taken altogether, the residues at the tail of FA binding pocket of OleT<sub>MC</sub>, such as P72  
207 and F296, are critical for determining the substrate specificity of OleT<sub>MC</sub>. Mutating these  
208 residues, instead of those at the catalytic site, can provide a promising protein engineering  
209 strategy to shift substrate specificity of OleT<sub>MC</sub>.

210

#### 211 **2.4 Establishing the terminal alkene biosynthesis pathway in *E. coli***

212 We designed the heterologous terminal alkene biosynthesis pathway in *E. coli* BL21 ( $\lambda$ DE3),  
213 consisting of two genes – the leaderless *tesA\** gene encoding a thioesterase to convert acyl  
214 ACPs to FAs and the OleT<sub>MC</sub> gene encoding a decarboxylase to convert these FAs to terminal  
215 alkenes. We chose TesA\* because it has higher specificities towards C16:0-C18:0 acyl ACPs  
216 than C12:0-C14:0 acyl ACPs (25) to produce corresponding FAs that are preferable substrates  
217 for OleT<sub>MC</sub>. Figure 5A-C shows kinetics of cell growth, sugar consumption, and product  
218 formation in shake flask experiments of the recombinant *E. coli* EcNN101 engineered to carry  
219 the terminal alkene biosynthesis pathway.

220 During the first 24 h of growth phase, EcNN101 could grow and produce odd terminal  
221 alkenes. At 24 h, cells completely consumed 20 g/L of glucose and entered the stationary phase  
222 with a biomass titer of  $4.16 \pm 0.07$  g/L (Figure 5A). Terminal alkene production peaked at a  
223 titer of  $21.92 \pm 0.69$  mg/L, comprised of  $4.5\% \pm 0.2\%$  C11 alkene,  $38.9\% \pm 1.1\%$  C13 alkene,  
224  $55.4\% \pm 0.8\%$  C15 alkene, and  $1.2\% \pm 0.5\%$  C17 alkene (Figure 5B). Besides alkenes, the  
225 corresponding FAs were also produced at a much higher titer of  $558.03 \pm 18.95$  mg/L,

226 consisting of  $24.9\% \pm 0.1\%$  C12:0 FA,  $41.0\% \pm 0.2\%$  C14:0 FA,  $25.2\% \pm 0.4\%$  C16:0 FA,  
227  $7.6\% \pm 0.3\%$  C18:0 FA, and  $1.4\% \pm 0.1\%$  C20:0 FA (Figure 5C). The composition of these  
228 FAs correlated well with the specificity of TesA\* (25). The relatively high FA production  
229 clearly implied that OleT<sub>MC</sub> was the rate-limiting step of the engineered terminal alkene  
230 biosynthesis pathway. The result also shows that the C15 alkene was produced at the highest  
231 level even though the fraction of C16:0 FA was lower than that of C14:0 FA and relatively  
232 similar to that of C12:0 FA. This result is consistent with the substrate preference of OleT<sub>MC</sub>  
233 towards C16:0 FA characterized *in vitro* and also implies that C16:0 FA was not limiting for  
234 decarboxylation. The production of C17 terminal alkene, however, was relatively low likely  
235 due to the low availability of C18:0 FA.

236 During the stationary phase (after 24 h), no glucose was available and about  $398.15 \pm$   
237  $4.79$  mg/L saturated FAs were consumed primarily for cell maintenance while cell  
238 concentration remained relatively constant. At 48 h, the alkene titer was slightly decreased to  
239  $17.78 \pm 0.63$  mg/L probably due to cell lysis and/or evaporation. The final alkene yield was  
240  $0.87 \pm 0.03$  mg/g. It is interesting to notice that EcNN101 did not produce terminal alkenes  
241 during stationary phase even though degradation of saturated FAs, highly reduced substrates,  
242 could generate available NAD(P)H for FA decarboxylation via the  $\beta$ -oxidation pathway. This  
243 result implies that olefin production might be limited by the efficiency of electrons transferred  
244 to OleT<sub>MC</sub> for decarboxylation.

245

## 246 **2.5 Improving terminal alkene production by enhancing electron shuttling to OleT<sub>MC</sub>**

247 It is known that the electron flow from NAD(P)H to the terminal P450 enzyme is facilitated by  
248 a two-component redox system such as ferredoxin reductase (FDR) and NAD(P)H-dependent  
249 ferredoxin (FDX). Most of the bacterial P450s belonging to the class I P450s use this two-  
250 component redox system for shuttling electrons (26, 27). We hypothesized that the OleT<sub>MC</sub>

251 activity in EcNN101 might have been limiting during the stationary phase due to the lack of a  
252 two-component redox system. To test this hypothesis, we constructed EcNN201 that contains  
253 both the terminal alkene biosynthesis pathway and a two-component redox system well-  
254 characterized for *E. coli*. This redox system consists of an NAD(P)H-dependent putidaredoxin  
255 reductase (CamA) and a [2Fe–2S] putidaredoxin (CamB) transferring two electrons, one at a  
256 time, from NAD(P)H to the P450 enzyme (26-28).

257 Like EcNN101, EcNN201 could produce terminal alkenes during the growth phase  
258 (Figure 5E). At 24 h, EcNN201 reached a cell concentration of  $5.29 \pm 0.05$  g/L and entered the  
259 stationary phase after completely consuming 20 g/L glucose (Figure 5D). EcNN201 produced  
260  $19.25 \pm 2.03$  mg/L terminal alkenes, comparable to EcNN101. The composition of terminal  
261 alkenes produced by EcNN201 comprised of  $2.4\% \pm 1.5\%$  C11 alkene,  $32.1\% \pm 5.8\%$  C13  
262 alkene,  $64.3\% \pm 6.7\%$  C15 alkene, and  $1.2\% \pm 0.3\%$  C17 alkene. Like EcNN101, EcNN201  
263 produced a high amount of saturated FAs ( $556.12 \pm 4.44$  mg/L) consisting of  $17.3\% \pm 0.3\%$   
264 C12:0 FA,  $40.0\% \pm 0.5\%$  C14:0 FA,  $33.3\% \pm 0.3\%$  C16:0 FA,  $7.8\% \pm 0.4\%$  C18:0 FA, and  
265  $1.6\% \pm 0.3\%$  C20:0 FA (Figure 5F). Overall, the terminal alkene production phenotypes were  
266 similar between EcNN101 and EcNN201 during the growth phase. This result implies that  
267 reducing equivalents were primarily channeled for ATP generation and biomass synthesis that  
268 are thermodynamically favorable under aerobic conditions, and hence likely became limited  
269 for decarboxylation to produce target alkenes.

270 However, during the stationary phase where glucose was not available, EcNN201  
271 consumed a total amount of  $407.45 \pm 22.19$  mg/L FAs for not only cell maintenance but also  
272 terminal alkene production. The terminal alkene production was increased up to 58% higher  
273 during the stationary phase than the growth phase, underlying the critical functional role of the  
274 redox system responsible for enhanced terminal alkene production. EcNN201 produced up to  
275  $49.64 \pm 1.33$  mg/L terminal alkenes, consisting of  $0.7\% \pm 0.1\%$  C11 alkene,  $26.4\% \pm 2.6\%$

276 C13 alkene,  $70.7\% \pm 3.0\%$  C15 alkene, and  $2.2\% \pm 0.4\%$  C17 alkene. At 48 h, the alkene titer  
277 and yield were  $49.64 \pm 1.33$  mg/L and  $2.44 \pm 0.06$  mg/g, respectively. In comparison to  
278 EcNN101, the terminal alkene production of EcNN201 increased by 2.8 fold. It is interesting  
279 to observe that C12:0-C14:0 FAs were primarily degraded for cell maintenance and C16:0 FA  
280 utilized for alkene biosynthesis based on the FA distributions at 24 and 48 h (Figure 5F). This  
281 degradation phenotype is consistent with the distribution of terminal alkenes as well as the  
282 substrate preference of the endogenous FA synthetase FadD of *E. coli* responsible for  
283 catalyzing the first step of the  $\beta$ -oxidation (29).

284 The FA decarboxylation was clearly the rate-limiting step in our engineered terminal  
285 alkene biosynthesis pathway due to high accumulation of saturated FAs observed during the  
286 growth phase. The main cause of limited decarboxylation is inefficient electron transfer. We  
287 can observe that EcNN101 could not produce terminal alkenes during this stationary phase due  
288 to lack of the electron transfer to OleT<sub>MC</sub>. This limitation could be overcome by introducing  
289 the two-component redox system in EcNN201. Specifically, the FA degradation during the  
290 stationary phase in EcNN201 generated high levels of reducing equivalents (i.e. NAD(P)H) via  
291  $\beta$ -oxidation, and the redox system helped channel electrons to OleT<sub>MC</sub>, thereby improving  
292 terminal alkene production.

293 EcNN201 produced terminal alkenes at a very comparable level to the recombinant *E.*  
294 *coli* harnessing the OleT<sub>JE</sub> decarboxylase from *Jeotgalicoccus sp.* (16). In our study, we did  
295 not observe EcNN101 and EcNN201 producing alkadienes even though unsaturated FAs were  
296 produced (Supplementary Figure S8). Because the current terminal alkene production in  
297 EcNN201 is very inefficient, improving carbon and electron fluxes via metabolic engineering  
298 is critical for enhanced terminal alkene production in future study. In addition, controlling  
299 environmental conditions (e.g., sufficient supply of oxygen and use of highly reduced  
300 substrates) can potentially help improve terminal alkene production.

### 301 **3. CONCLUSION**

302 In this study, we discovered and characterized a novel P450 FA decarboxylase OleT<sub>MC</sub> for  
303 H<sub>2</sub>O<sub>2</sub>-independent biosynthesis of odd-chain, terminal alkenes. By combining the homology  
304 modeling, *in silico* residue mutation analysis, and docking simulation with direct experimental  
305 evidence, we elucidated the underlying mechanism that determines the substrate preferences  
306 of OleT<sub>MC</sub>. In addition, we demonstrated the direct biosynthesis of medium- and long-chain  
307 terminal alkenes in an engineered *E. coli* from fermentable sugars, abundant from  
308 lignocellulosic biomass. We found that the inefficient electron transfer in OleT<sub>MC</sub> was the rate  
309 limiting step that could be overcome by introducing a two-component redox system. Our  
310 results help lay out a foundation for future study to modulate fatty acid thioesterases and OleT<sub>MC</sub>  
311 specificities to produce designer terminal alkenes with desirable carbon chain characteristics.  
312 Overall, this study provides a better understanding of the novel functions of FA decarboxylases  
313 and helps guide future protein and metabolic engineering for enhanced terminal alkene  
314 production in a recombinant host.

315

### 316 **4. MATERIALS AND METHODS**

#### 317 **4.1 Bacterial strains and plasmids**

318 Table 1 shows a list of bacterial strains and plasmids used in this study. *E. coli* TOP10 was  
319 used for molecular cloning while BL21 ( $\lambda$ DE3) was employed as an expression and  
320 characterization host. All plasmids were constructed by using a modified pETite\* (30), a  
321 derivative of pETite C-His backbone vector (Lucigen Corp., WI, USA), suitable for the  
322 BglBricks gene assembly method (31). Primers used to construct the plasmids in this study are  
323 listed in Table 2.

324 To construct the plasmid pCT71, the leaderless *tesA*\* was amplified from the genomic  
325 DNA of *E. coli* MG1655 using the primers mw.24f/p064\_r, and inserted into pETite\* via the

326 NdeI/XhoI sites. The gene *tesA\** was derived from *tesA* whose leader peptide sequence was  
327 removed to keep the encoded protein TesA\* localized in the cytosol (32). The plasmid pNN33  
328 was constructed by the Gibson gene assembly method (33) using 2 DNA fragments: i) the  
329 decarboxylase gene *Ole<sub>TMc</sub>* amplified from the genomic DNA of *M. caseolyticus* using the  
330 primers Nhis6\_*Ole<sub>TMc</sub>*F/Nhis6\_*Ole<sub>TMc</sub>*R and ii) the backbone fragment amplified from  
331 pETite\* using the primers pnn33\_Nhis6F/pnn33\_Nhis6R. To construct the plasmid pNN32,  
332 *Ole<sub>TMc</sub>* was amplified using the primers mc\_decarbF/rev\_decarb and inserted into pCT71 via  
333 the BamHI/XhoI sites. The plasmid pNN34 was constructed by the Gibson gene assembly  
334 method using 3 DNA fragments: i) *camA* gene amplified from the genomic DNA of *P. putida*  
335 using the primers pnn82/pnn83, ii) *camB* amplified from the genomic DNA of *P. putida* using  
336 the primers pnn84/pnn85, and iii) the backbone fragment amplified from pETite\* using the  
337 primers pETiteF/pETiteR. All plasmid constructs were confirmed by enzyme digestion, PCR  
338 amplification of the respective genes, and sequencing.

339 The strain EcNN101 was generated by introducing pNN32 into BL21 ( $\lambda$ DE3) via  
340 electroporation. Similarly, the strain EcNN201 was created by co-transforming pNN32 and  
341 pNN34 into BL21 ( $\lambda$ DE3).

342

#### 343 **4.2 Medium and strain characterization**

344 *Medium.* For molecular cloning and protein expression, Luria-Bertani (LB) medium  
345 containing 5 g/L yeast extract, 10 g/L tryptone, 5 g/L NaCl, and antibiotics (if applicable) was  
346 used for *E. coli* and *P. putida* cultures. The medium for cultivating *M. caseolyticus* was  
347 comprised of 5 g/L glucose, 5 g/L yeast extract, 10 g/L casein peptone, and 5 g/L NaCl. The  
348 hybrid M9 medium used for strain characterization contained 1X M9 salt solution (34), 1 mM  
349 MgSO<sub>4</sub>, 10 mM CaCl<sub>2</sub>, 1 mL/L stock trace metals solution, 5 g/L yeast extract, 20 g/L glucose,  
350 and appropriate antibiotics (e.g., 50  $\mu$ g/mL kanamycin or 100  $\mu$ g/mL ampicillin for single

351 plasmid selection or 25  $\mu\text{g}/\text{mL}$  kanamycin plus 50  $\mu\text{g}/\text{mL}$  ampicillin for double plasmid  
352 selection) (35).

353 *Strain characterization.* For terminal alkene production experiments, single colonies  
354 were inoculated in 15 mL tubes containing 8 mL of LB medium and incubated in a rotary  
355 shaker at 37°C with a shaking rate of 175 rpm for 12 hour (h). The overnight seed culture was  
356 then transferred into the hybrid M9 medium with an initial  $\text{OD}_{600\text{nm}} \sim 0.05$  in 500 mL baffled  
357 shake flasks with a 100 mL working volume. When reaching the exponential phase of  $\text{OD}_{600\text{nm}}$   
358  $\sim 0.6$ , the cell culture was first supplemented with 1 mM 5-aminolevulinic acid (ALA) to  
359 enhance the yield of active P450 (36), followed by IPTG induction at a working concentration  
360 of 0.5 mM, and run for a total of 48 h. Samples were collected for determining cell growth,  
361 substrate consumption, and product formation. All experiments were performed in biological  
362 triplicates.

363

#### 364 **4.3 Enzyme expression, purification, and characterization**

365 BL21 ( $\lambda\text{DE3}$ ) pNN33 was used to express Ole<sub>TMC</sub> His-tagged at the N-terminus in LB  
366 medium at 20 celcius (°C). Exponentially grown cells ( $\text{OD}_{600\text{nm}} \sim 0.6$ ) were induced with IPTG  
367 at a working concentration of 0.5 mM. After 20 h, cells were collected, washed, and  
368 resuspended in 50 mM phosphate buffer (pH 7.5). The resuspended cells were disrupted by  
369 ultrasonication with a sonic dismembrator (Model # FB120, Thermo Fisher Scientific Inc.,  
370 MA, USA) and then centrifuged at 13,500 rcf for 20 min at 4°C to collect the soluble crude cell  
371 extract for downstream protein purification. The sonication protocol was set with 70%  
372 amplitude with cycles of 5 second ON/10 second OFF pulses on ice for 15 minutes.

373 The expressed Ole<sub>TMC</sub> protein was semi-purified by the HisPur Ni-NTA Spin column  
374 (cat # PI88224, Thermo Fisher Scientific, MA, USA) according to the manufacturer's  
375 instruction. Following incubation for 1 h at 4°C, the resin was washed three times with wash



376 buffer (20 mM of imidazole) and the His-tagged OleT<sub>MC</sub> was eluted from the resin by adding  
377 elution buffer (500 mM of imidazole). Then, the final protein sample was concentrated using  
378 Amicon Ultra centrifugal filters (cat # UFC801024, Merck, NJ, USA). The purified protein  
379 was analyzed by the 12% SDS-PAGE and the protein concentration was determined by the  
380 Bradford assay (37).

381 To quickly test the active form of OleT<sub>MC</sub> (i.e., the actual heme content of P450 protein),  
382 the spectrophotometric carbon monoxide (CO) difference spectral analysis was routinely  
383 carried out to determine the maximum characteristic absorbance at 450 nm (38). First, 0.5 mL  
384 of 20 mg/mL purified protein sample was diluted in 4.5 mL of 50 mM Tris-HCl buffer (pH  
385 7.6) containing 1 mM EDTA and 10% (v/v) glycerol. The solution was then supplemented with  
386 a few crystals of sodium dithionite and saturated with ~30-40 bubbles of CO at a rate of 1  
387 bubble per second. The maximum spectrophotometric absorbance peak at 450 nm indicates the  
388 reduced P450 complexed with CO and hence confirms the enzymatic catalytic center of OleT<sub>MC</sub>  
389 is active.

390 The H<sub>2</sub>O<sub>2</sub>-independent FA decarboxylase activity of OleT<sub>MC</sub> was characterized *in vitro*  
391 with various linear, saturated C8:0-C20:0 FAs. Each reaction assay has a working volume of  
392 500 µL that contained 1 mM NADH, 10 µM spinach ferredoxin (cat. # F3013, Sigma Aldrich,  
393 CA, USA), 0.5 unit spinach ferredoxin reductase (cat. # F0628, Sigma Aldrich, CA, USA), 20  
394 µg/mL purified OleT<sub>MC</sub>, and 0.05 mM FAs. The assay was conducted at 37°C for 60 min. After  
395 the reaction, alkenes were extracted with ethyl acetate, and analyzed by gas chromatography  
396 coupled with mass spectrometry.

397

#### 398 **4.4 Analytical methods**

399            *Cell growth.* Cell optical density was measured at OD<sub>600nm</sub> using a spectrophotometer  
400 (Spectronic 20+, Thermo Fisher Scientific, MA, USA). The correlation between the cell optical  
401 density and dry cell weight (DCW) was determined to be 1 OD<sub>600nm</sub> = 0.48 g DCW/L.

402            *High performance liquid chromatography (HPLC).* The HPLC Shimadzu system  
403 equipped with a BioRad Aminex HPX 87-H column (cat # 1250140, BioRad, CA, USA) and  
404 both RID and UV-VIS detectors (Shimadzu Scientific Instruments, Inc., MD, USA) were used  
405 to quantify extracellular metabolites (e.g., glucose, organic acids, and alcohols). The running  
406 method used 10 mM H<sub>2</sub>SO<sub>4</sub> as a mobile phase operated at a flow rate of 0.6 mL/min and an  
407 oven temperature set at 48°C (39).

408            *Gas chromatography coupled with mass spectroscopy (GC/MS).* For FAs analysis,  
409 sample preparation and GC/MS methods were described previously (40). For terminal alkene  
410 analysis, 500 µL of samples (cells plus supernatants) were transferred to a 2 ml polypropylene  
411 microcentrifuge tube with a screw cap containing 100-200 mg of glass beads (0.25-0.30 mm  
412 in diameter), 60 µL of 6 N HCl, and 500 µL of ethyl acetate solution containing 1 mg/L of ethyl  
413 pentadecanoate as an internal standard. The cells were lysed by bead bashing for 4 min using  
414 a Biospec Mini BeadBeater 16 and then centrifuged at 13,300g for 2 min. The extractants of  
415 the organic layer were used for the GC/MS analysis. All alkenes were analyzed by using  
416 HP6890 GC/MS system equipped with a 30 m x 0.25 mm i.d. 0.25 µm film thickness column  
417 plus an attached 10 m guard column (Zebron ZB-5, Phenomenex Inc.) and a HP 5973 mass  
418 selective detector. An electron ionization in scan mode (50 to 650 m/z) method was deployed  
419 to analyze 1 µL of samples. The column temperature was initially held at 50°C for 1 min,  
420 increased by 20°C/min until 300°C, and held for 2 min. Helium was used as a carrier gas and  
421 run at 1 mL/min. The mass transfer line and ion source were set at 250°C and 200°C,  
422 respectively.

423

## 424 **4.5 Bioinformatics**

425 For sequence alignment and phylogenetic analysis, protein sequences were retrieved from the  
426 National Center for Biotechnology Information (NCBI), and were inputted into MEGA7 (41)  
427 and aligned via MUSCLE (42). The phylogenetic tree was generated using the neighbor-joining  
428 algorithm with a 1000 bootstrap value. BLASTp was used to calculate the identity of sequences  
429 (43) using OleT<sub>JE</sub> as the template.

430

## 431 **4.6 Homology modeling and *in silico* analysis of OleT<sub>MC</sub>**

432 *Homology modeling.* The homology model of OleT<sub>MC</sub> was generated using the version  
433 2015.10 Molecular Operating Environment (MOE) software (21). To obtain the heme-bound  
434 protein structure, the reference substrate, heme, was first extracted from the best hit, substrate-  
435 bound crystallographic structure of OleT<sub>JE</sub> (PDB:4L40) and then added to the homology model  
436 of OleT<sub>MC</sub>. Next, the heme-bound model of OleT<sub>MC</sub> generated was optimized by energy  
437 minimization using the Amber10:EHT (Extended Huckel Theory) force field (44, 45). The  
438 Ramachandran plot analysis was performed to determine the overall stereochemical property  
439 of the protein model.

440 *Docking simulation.* To dock various FAs with the heme-bound homology model of  
441 OleT<sub>MC</sub>, the 3D structures of various C10:0-C18:0 FAs were first generated by modifying  
442 C20:0 FA extracted from OleT<sub>JE</sub> (PDB:4L40) with the ‘3D builder’ tool of MOE and then  
443 optimized by energy minimization using the Amber10:EHT force field. Next, the “site finder”  
444 tool of MOE was used to search for potential binding sites. Upon identifying the site consistent  
445 with the reported catalytic site of OleT<sub>JE</sub> (20), dummy atoms were generated to mark potential  
446 binding sites. To select the exclusive potential binding site of FA, we also removed some  
447 dummy atoms located near heme. Finally, we added the target C10:0-C18:0 FAs to the binding

448 site of the heme-bound homology model of OleT<sub>MC</sub>. All structures were protonated using the  
449 “protonate3D” tool of MOE prior to docking simulation.

450 Docking simulations were carried out as previously described (46). In brief, the induced  
451 fit docking protocol employed the Triangle Matcher placement method and the London  $\Delta G$   
452 scoring function. In our docking simulations, we performed 30 docking interactions for each  
453 FA substrate. The binding free energy ( $\Delta G_{bind}$ , in kcal/mol) for each binding pose was then  
454 minimized using the Amber10:EHT force field and rescored with the GBVI/WSA  $\Delta G$  scoring  
455 function (44). The best scored pose, exhibiting the crucial interaction between the residue  
456 Arg246 and carboxylic functional group of the substrate via hydrogen bonding (20) at root-  
457 mean-square-deviation (RMSD)  $< 2 \text{ \AA}$ , was selected for further analysis. The “surface and  
458 maps” tool of MOE was employed to visualize the molecular surface of atoms in the potential  
459 FA binding site.

460 *In silico mutation analysis.* The “alanine scan” and the “residue scan” tools in MOE  
461 were used for *in silico* mutation analysis of FA-OleT<sub>MC</sub> complexes. Specifically, the alanine  
462 scanning technique (47, 48) was employed to determine the importance of a specific residue to  
463 the stability, affinity, and/or property of the FA-OleT<sub>MC</sub> complexes upon being substituted with  
464 Ala in the binding pocket. Residue scanning technique, also known as site-directed  
465 mutagenesis (49), was applied to generate large number of OleT<sub>MC</sub> variants for the  
466 comprehensive mutation study using the selected residues from the alanine scan. By utilizing  
467 these tools, we could replace each of the interface residues with a specific residue of interest  
468 and calculates the effect of the mutation on the binding free energy ( $\Delta G_{bind}$ ) of the complexes.  
469 The  $\Delta$ Stability values (kcal/mol) were calculated as the relative binding free energy difference  
470 ( $\Delta\Delta G_{bind}$ ) between the mutant ( $\Delta G_{mutant}$ ) and wild type ( $\Delta G_{wildtype}$ ) in MOE.

471 **ACKNOWLEDGEMENTS**

472 We would like to thank Dr. Fu-min Menn (Center of Environmental Biotechnology, UTK) for  
473 his assistance in developing the GC/MS method, Dr. Jerome Baudry (UTK) for accessing the  
474 MOE software, Dr. Donovan Layton (UTK) for assistance with GC/MS and bioinformatics  
475 analyses, and members of Trinh lab for proofreading and providing critical comments on the  
476 manuscript.

477

478 **FUNDING**

479 This research was supported by the laboratory start-up, SEERC, and JDRD seed funds from  
480 the University of Tennessee, Knoxville (UTK), a NSF CAREER award (NSF#1553250 to  
481 CTT), and a DOE subcontract grant (DE-AC05-00OR22725) by the Center of Bioenergy  
482 Innovation (CBI), the U.S. Department of Energy Bioenergy Research Center funded by the  
483 Office of Biological and Environmental Research in the DOE Office of Science.

484

485 Conflict of interest statement: None declared

## 486 REFERENCES

487

488 1. Lappin GR, Sauer JD. 1989. Alpha Olefins Applications Handbook, vol 37. CRC Press.

489 2. Ren T, Patel M, Blok K. 2006. Olefins from conventional and heavy feedstocks: Energy  
490 use in steam cracking and alternative processes. *Energy* 31:425-451.

491 3. Mol J. 2004. Industrial applications of olefin metathesis. *Journal of Molecular Catalysis*  
492 *A: Chemical* 213:39-45.

493 4. Rude MA, Baron TS, Brubaker S, Alibhai M, Del Cardayre SB, Schirmer A. 2011.  
494 Terminal olefin (1-alkene) biosynthesis by a novel p450 fatty acid decarboxylase from  
495 *Jeotgalicoccus* species. *Applied and Environmental Microbiology* 77:1718-1727.

496 5. Beller HR, Goh E-B, Keasling JD. 2010. Genes Involved in Long-Chain Alkene  
497 Biosynthesis in *Micrococcus luteus*. *Applied and Environmental Microbiology* 76:1212-1223.

498 6. Mendez-Perez D, Begemann MB, Pflieger BF. 2011. Modular Synthase-Encoding Gene  
499 Involved in  $\alpha$ -Olefin Biosynthesis in *Synechococcus* sp. Strain PCC 7002. *Applied and*  
500 *Environmental Microbiology* 77:4264-4267.

501 7. Rui Z, Harris NC, Zhu X, Huang W, Zhang W. 2015. Discovery of a Family of  
502 Desaturase-Like Enzymes for 1-Alkene Biosynthesis. *ACS Catalysis* 5:7091-7094.

503 8. Rui Z, Li X, Zhu X, Liu J, Domigan B, Barr I, Cate JHD, Zhang W. 2014. Microbial  
504 biosynthesis of medium-chain 1-alkenes by a nonheme iron oxidase. *Proceedings of the*  
505 *National Academy of Sciences* 111:18237-18242.

506 9. Chen B, Lee D-Y, Chang MW. 2015. Combinatorial metabolic engineering of  
507 *Saccharomyces cerevisiae* for terminal alkene production. *Metabolic Engineering* 31:53-61.

508 10. Zhu Z, Zhou YJ, Kang M-K, Krivoruchko A, Buijs NA, Nielsen J. 2017. Enabling the  
509 synthesis of medium chain alkanes and 1-alkenes in yeast. *Metabolic Engineering* 44:81-88.

510 11. Winters K, Parker P, Van Baalen C. 1969. Hydrocarbons of blue-green algae:  
511 geochemical significance. *Science* 163:467-468.

- 512 12. Tornabene T. 1982. Microorganisms as hydrocarbon producers, p 49-52, New Trends  
513 in Research and Utilization of Solar Energy through Biological Systems. Springer.
- 514 13. Ladygina N, Dedyukhina E, Vainshtein M. 2006. A review on microbial synthesis of  
515 hydrocarbons. *Process Biochemistry* 41:1001-1014.
- 516 14. Görgen G, Fröbl C, Boland W, Dettner K. 1990. Biosynthesis of 1-alkenes in the  
517 defensive secretions of *Tribolium confusum* (Tenebrionidae); stereochemical implications.  
518 *Experientia* 46:700-704.
- 519 15. Ney P, Boland W. 1987. Biosynthesis of 1-alkenes in higher plants. *European Journal*  
520 *of Biochemistry* 162:203-211.
- 521 16. Liu Y, Wang C, Yan J, Zhang W, Guan W, Lu X, Li S. 2014. Hydrogen peroxide-  
522 independent production of  $\alpha$ -alkenes by OleTJE P450 fatty acid decarboxylase. *Biotechnol*  
523 *Biofuels* 7:28.
- 524 17. Mendez-Perez D, Herman NA, Pfleger BF. 2014. A Desaturase Gene Involved in the  
525 Formation of 1, 14-Nonadecadiene in *Synechococcus* sp. Strain PCC 7002. *Applied and*  
526 *Environmental Microbiology* 80:6073-6079.
- 527 18. Dennig A, Kuhn M, Tassoti S, Thiessenhusen A, Gilch S, Bültner T, Haas T, Hall M,  
528 Faber K. 2015. Oxidative Decarboxylation of Short-Chain Fatty Acids to 1-Alkenes.  
529 *Angewandte Chemie International Edition* 54:8819-8822.
- 530 19. Belcher J, McLean KJ, Matthews S, Woodward LS, Fisher K, Rigby SE, Nelson DR,  
531 Potts D, Baynham MT, Parker DA. 2014. Structure and biochemical properties of the alkene  
532 producing cytochrome P450 OleTJE (CYP152L1) from the *Jeotgalicoccus* sp. 8456  
533 bacterium. *Journal of Biological Chemistry* 289:6535-6550.
- 534 20. Matthews S, Belcher JD, Tee KL, Girvan HM, McLean KJ, Rigby SE, Levy CW, Leys  
535 D, Parker DA, Blankley RT, Munro AW. 2017. Catalytic Determinants of Alkene Production  
536 by the Cytochrome P450 Peroxygenase OleTJE. *J Biol Chem* 292:5128-5143.

- 537 21. MOE. Molecular Operating Environment (MOE), Chemical Computing Group ULC,  
538 1010 Sherbooke St. West, Suite #910, Montreal, QC, Canada, H3A 2R7.
- 539 22. Hsieh CH, Makris TM. 2016. Expanding the substrate scope and reactivity of  
540 cytochrome P450 OleT. *Biochem Biophys Res Commun* 476:462-466.
- 541 23. Fang B, Xu H, Liu Y, Qi F, Zhang W, Chen H, Wang C, Wang Y, Yang W, Li S. 2017.  
542 Mutagenesis and redox partners analysis of the P450 fatty acid decarboxylase OleTJE. *Sci Rep*  
543 7:44258.
- 544 24. Du J, Liu L, Guo LZ, Yao XJ, Yang JM. 2017. Molecular basis of P450 OleT(JE): an  
545 investigation of substrate binding mechanism and major pathways. *Journal of Computer-*  
546 *Aided Molecular Design* 31:483-495.
- 547 25. Bonner WM, Bloch K. 1972. Purification and Properties of Fatty Acyl Thioesterase I  
548 from *Escherichia coli*. *Journal of Biological Chemistry* 247:3123-3133.
- 549 26. Peterson J, Lorence M, Amarneh B. 1990. Putidaredoxin reductase and putidaredoxin.  
550 Cloning, sequence determination, and heterologous expression of the proteins. *Journal of*  
551 *Biological Chemistry* 265:6066-6073.
- 552 27. Gunsalus I, Sligar S. 1978. Oxygen reduction by the P450 monooxygenase systems.  
553 *Advances in Enzymology and Related Areas of Molecular Biology*, Volume 47:1-44.
- 554 28. Green AJ, Munro AW, Cheesman MR, Reid GA, von Wachenfeldt C, Chapman SK.  
555 2003. Expression, purification and characterisation of a *Bacillus subtilis* ferredoxin: a potential  
556 electron transfer donor to cytochrome P450 BioI. *Journal of inorganic biochemistry* 93:92-99.
- 557 29. Kameda K, Nunn W. 1981. Purification and characterization of acyl coenzyme A  
558 synthetase from *Escherichia coli*. *Journal of Biological Chemistry* 256:5702-5707.
- 559 30. Layton DS, Trinh, C.T. 2014. Engineering Modular Ester Fermentative Pathways in  
560 *Escherichia coli*. *Metab Eng* 26:77-88.



- 561 31. Anderson JC, Dueber J, Leguia M, Wu G, Goler J, Arkin A, Keasling J. 2010.  
562 BglBricks: A flexible standard for biological part assembly. *Journal of Biological Engineering*  
563 4:1.
- 564 32. Cho H, Cronan JE. 1995. Defective Export of a Periplasmic Enzyme Disrupts  
565 Regulation of Fatty Acid Synthesis. *Journal of Biological Chemistry* 270:4216-4219.
- 566 33. Gibson DG. 2009. Synthesis of DNA fragments in yeast by one-step assembly of  
567 overlapping oligonucleotides. *Nucleic Acids Research* 37:6984-6990.
- 568 34. Sambrook J. 2001. *Molecular Cloning: A Laboratory Manual*. Cold Spring Harbor  
569 Laboratory Press.
- 570 35. Trinh CT, Li J, Blanch HW, Clark DS. 2011. Redesigning *Escherichia coli* Metabolism  
571 for Anaerobic Production of Isobutanol. *Appl Environ Microbiol* 77:4894-4904.
- 572 36. Jansson I, Stoilov I, Sarfarazi M, Schenkman JB. 2000. Enhanced expression of  
573 CYP1B1 in *Escherichia coli*. *Toxicology* 144:211-219.
- 574 37. Bradford M. 1976. A rapid and sensitive method for the quantitation of microgram  
575 quantities of protein utilizing the principle of protein-dye binding. *Analytical Biochemistry*  
576 72:248 - 254.
- 577 38. Omura T, Sato R. 1964. The carbon monoxide-binding pigment of liver microsomes. I.  
578 Evidence for its hemoprotein nature. *J Biol Chem* 239:2370-2378.
- 579 39. Trinh CT, Unrean P, Srienc F. 2008. Minimal *Escherichia coli* cell for the most efficient  
580 production of ethanol from hexoses and pentoses. *Applied and Environmental Microbiology*  
581 74:3634-3643.
- 582 40. Wierzbicki M, Niraula N, Yarrabothula A, Layton DS, Trinh CT. 2016. Engineering an  
583 *Escherichia coli* platform to synthesize designer biodiesels. *J Biotechnol* 224:27-34.
- 584 41. Kumar S, Stecher G, Tamura K. 2016. MEGA7: Molecular Evolutionary Genetics  
585 Analysis Version 7.0 for Bigger Datasets. *Molecular Biology and Evolution* 33:1870-1874.

- 586 42. Edgar RC. 2004. MUSCLE: multiple sequence alignment with high accuracy and high  
587 throughput. *Nucleic Acids Research* 32:1792-1797.
- 588 43. Altschul SF, Gish W, Miller W, Myers EW, Lipman DJ. 1990. Basic local alignment  
589 search tool. *Journal of Molecular Biology* 215:403-410.
- 590 44. Corbeil CR, Williams CI, Labute P. 2012. Variability in docking success rates due to  
591 dataset preparation. *J Comput Aided Mol Des* 26:775-86.
- 592 45. Case DA, Cheatham TE, 3rd, Darden T, Gohlke H, Luo R, Merz KM, Jr., Onufriev A,  
593 Simmerling C, Wang B, Woods RJ. 2005. The Amber biomolecular simulation programs. *J*  
594 *Comput Chem* 26:1668-88.
- 595 46. Liu M, Zheng N, Li D, Zheng H, Zhang L, Ge H, Liu W. 2016. cyp51A-based  
596 mechanism of azole resistance in *Aspergillus fumigatus*: Illustration by a new 3D Structural  
597 Model of *Aspergillus fumigatus* CYP51A protein. *Med Mycol* 54:400-8.
- 598 47. Massova I, Kollman PA. 1999. Computational alanine scanning to probe protein-  
599 protein interactions: A novel approach to evaluate binding free energies. *Journal of the*  
600 *American Chemical Society* 121:8133-8143.
- 601 48. Morrison KL, Weiss GA. 2001. Combinatorial alanine-scanning. *Current Opinion in*  
602 *Chemical Biology* 5:302-307.
- 603 49. Eriksen DT, Lian JZ, Zhao HM. 2014. Protein design for pathway engineering. *Journal*  
604 *of Structural Biology* 185:234-242.
- 605

606 **Table 1:** List of strains and plasmids

| Strains/plasmids       | Genotype                                                                                                                                                       | Sources     |
|------------------------|----------------------------------------------------------------------------------------------------------------------------------------------------------------|-------------|
| <i>Strains</i>         |                                                                                                                                                                |             |
| <i>P. putida</i>       | wildtype                                                                                                                                                       | ATCC17453   |
| <i>M. caseolyticus</i> | wildtype                                                                                                                                                       | ATCC13548   |
| TOP10                  | F <sup>-</sup> mcrA Δ(mrr-hsdRMS-mcrBC) φ80lacZΔM15<br>ΔlacX74 nupG recA1 araD139 Δ(ara-leu)7697<br>galE15 galK16 rpsL(Str <sup>R</sup> ) endA1 λ <sup>-</sup> | Invitrogen  |
| BL21 (λDE3)            | F <sup>-</sup> ompT hsdS <sub>B</sub> (r <sub>B</sub> <sup>-</sup> m <sub>B</sub> <sup>-</sup> ) gal dcm (λDE3)                                                | Invitrogen  |
| EcNN101                | BL21 (λDE3) carrying pNN32                                                                                                                                     | this study  |
| EcNN201                | BL21 (λDE3) carrying pNN32 and pNN34                                                                                                                           | this study  |
| <i>Plasmids</i>        |                                                                                                                                                                |             |
| pETite C-His           | pBR322 <i>ori</i> ; kan <sup>R</sup>                                                                                                                           | Lucigen     |
| pETite*                | kan <sup>R</sup>                                                                                                                                               | Layton 2014 |
| pCT71                  | pETite* p <sub>T7</sub> :: <i>tesA</i> *::T <sub>T7</sub> ; kan <sup>R</sup>                                                                                   | this study  |
| pNN33                  | pETite* p <sub>T7</sub> :: <i>oleT<sub>MC</sub></i> ::T <sub>T7</sub> ; kan <sup>R</sup>                                                                       | this study  |
| pNN32                  | pETite* p <sub>T7</sub> :: <i>tesA</i> *:: <i>oleT<sub>MC</sub></i> :: T <sub>T7</sub> ; kan <sup>R</sup>                                                      | this study  |
| pNN34                  | pETite* p <sub>T7</sub> :: <i>camAB</i> ::T <sub>T7</sub> ; amp <sup>R</sup>                                                                                   | this study  |

607

608

609 **Table 2:** List of primers

610

| <b>Primers</b>             | <b>Primer sequence (5' to 3')</b>                                                  |
|----------------------------|------------------------------------------------------------------------------------|
| mw.24f                     | AAA AAA CAT ATG GCG GAC ACG TTA TTG ATT CT                                         |
| p064_r                     | AAA AAA CTC GAG TTA GGA TCC TTA TGA GTC ATG ATT<br>TAC TAA AG                      |
| Nhis6_OleT <sub>Mc</sub> F | AGA AGG AGA TAT ACA TAT GCA TCA TCA CCA CCA TCA<br>CAG TAA AAG AGT TCC TAA AGA TAG |
| Nhis6_OleT <sub>Mc</sub> R | GTT ATG CTA GTT ATT GCT CAG CGG TGG CGG CCG CTC<br>TAT TAT TTT GTA CGG TCG ATA TTC |
| pnn33_Nhis6F               | TAA TAG AGC GGC CGC CAC                                                            |
| pnn33_Nhis6R               | GTG ATG GTG GTG ATG ATG CAT ATG TAT ATC TCC TTC<br>TTA TAG TTA AAC AAA ATT AT      |
| mc_DecarbF                 | ATG GAT CCA AAA ATG AGG GTA GAG TTT ACT ATT AA                                     |
| rev-Decarb                 | ATC TCG AGT TAT TTT GTA CGG TCG ATA TTC ACC CT                                     |
| pnn82                      | ATA ATT TTG TTT AAC TAT AAG AAG GAG ATA TAC ATA<br>TGA ACG CAA ACG ACA ACG TGG TC  |
| pnn83                      | GAC ACA TAC ACT ACT TTA GAC ATT TAT ATC TCC TTT<br>CAG GCA CTA CTC AGT TCA GCT TT  |
| pnn84                      | AAA GCT GAA CTG AGT AGT GCC TGA AAG GAG ATA TAA<br>ATG TCT AAA GTA GTG TAT GTG TC  |
| pnn85                      | GTG ATG ATG CTC GAG TTA GGA TCC TTA CCA TTG CCT<br>ATC GGG AAC ATC                 |
| pETiteF                    | GGA TCC TAA CTC GAG CAT CAT CAC CAC CAT CAC TA                                     |
| pETiteR                    | TAT ATC TCC TTC TTA TAG TTA AAC AAA ATT ATT TC                                     |

611

612

613

## 614 **FIGURE LEGENDS**

615 **Figure 1:** Synthetic pathway for endogenous production of terminal alkenes in *E. coli*

616

617 **Figure 2:** Phylogenetic analysis of OleT<sub>JE</sub> with the CYP152 P450 enzyme family. OleT<sub>JE</sub> is  
618 shown in the box. The enzymes that have the conserved OleT<sub>JE</sub> catalytic site residues Phe79,  
619 His85, and Arg245 are marked with “\*”

620

621 **Figure 3:** (A) Specific and relative specific activities of OleT<sub>MC</sub> towards linear, saturated  
622 C10:0-C18:0 FAs. Each value is an average  $\pm$  1 standard deviation ( $n \geq 2$ ). (B) Comparison of  
623 predicted binding free energies for C10:0-C18:0 FAs between the OleT<sub>MC</sub> wildtype and  
624 mutants. (C) Correlation between *in vitro* specific activities and *in silico* binding free energies  
625 of OleT<sub>MC</sub> with various C10:0-C18:0 FAs. (D) *In silico* alanine scan of the potential FAs  
626 binding pocket with C10:0-C18:0 FAs-OleT<sub>MC</sub> complexes.

627

628 **Figure 4:** (A) Comparison of the protein structures between the homology model of OleT<sub>MC</sub>  
629 (in yellow) and the crystal structure of C20:0 FA-bound OleT<sub>JE</sub> (in cyan; PDB:4L40). (B)  
630 Overlay of the catalytic site structures of OleT<sub>MC</sub> (in yellow) and OleT<sub>JE</sub> (in cyan). (C) A  
631 homology model of OleT<sub>MC</sub> docked with C18:0 FA. (D-H) Overlay of the potential FA binding  
632 pocket of the wildtype OleT<sub>MC</sub> (in yellow) and the OleT<sub>MC</sub> variants including (D) I177W (in  
633 red) (E) P72M (in blue) (F) F296W (in purple) (G) I177F (in pink) (H) P72F (in gray). Filled  
634 red triangles point to the distinctive features in the FA binding pockets of the OleT<sub>MC</sub> variants  
635 as compared to the wildtype.

636

637 **Figure 5:** Profiles of alkenes production in *E. coli* (**A-C**) EcNN101 and (**E-F**) and EcNN201.

638 (**A, D**) Cell growth and glucose consumption, (**B, E**) Terminal alkene production, and (**C, F**)

639 FA production.

640

641

642 **FIGURE 1**

643

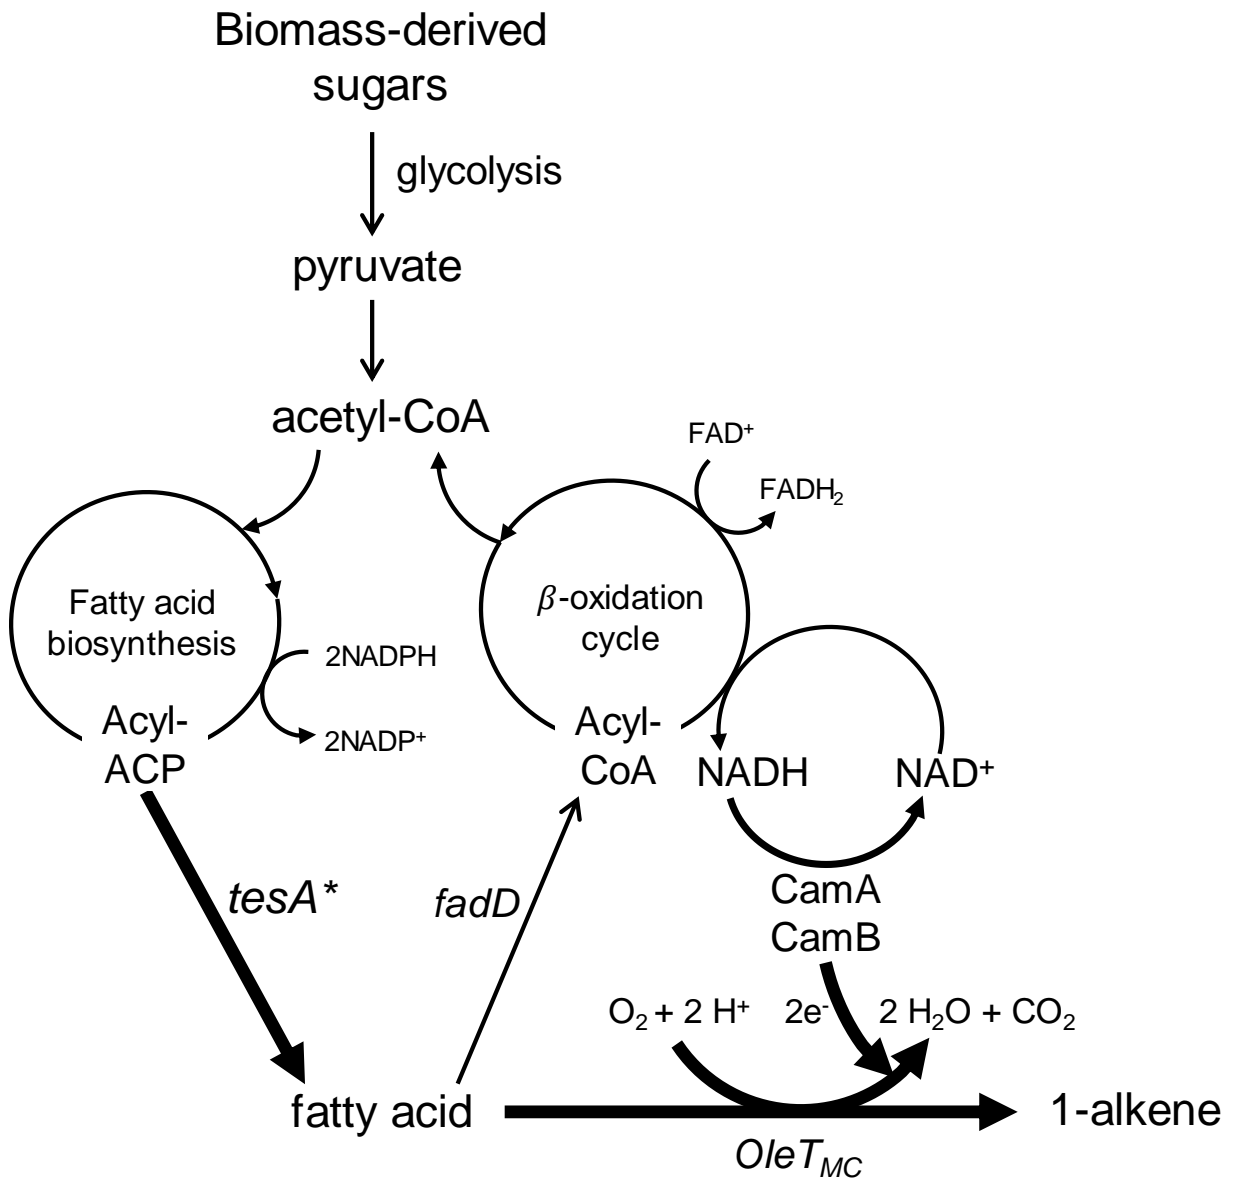

644

645

646 **FIGURE 2**

647

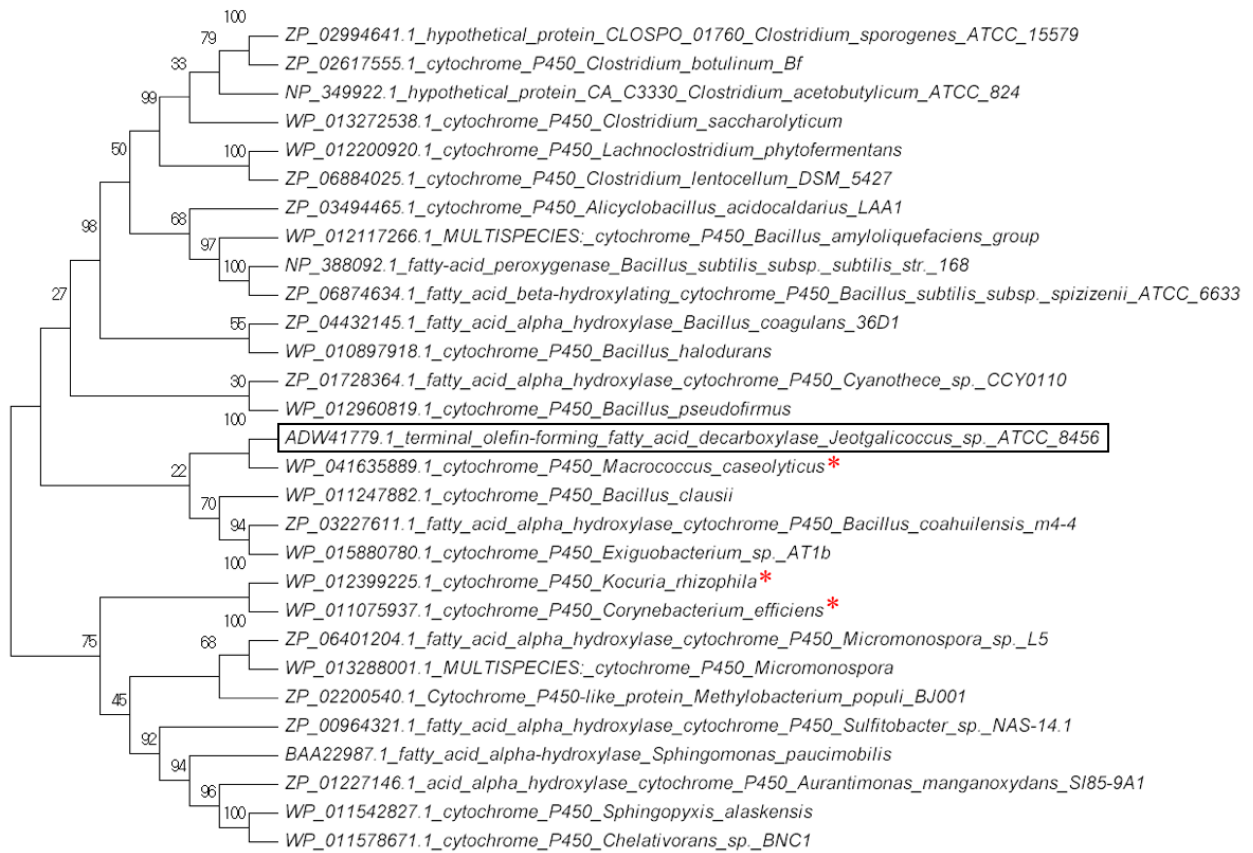

648

649



650 **FIGURE 3**

651

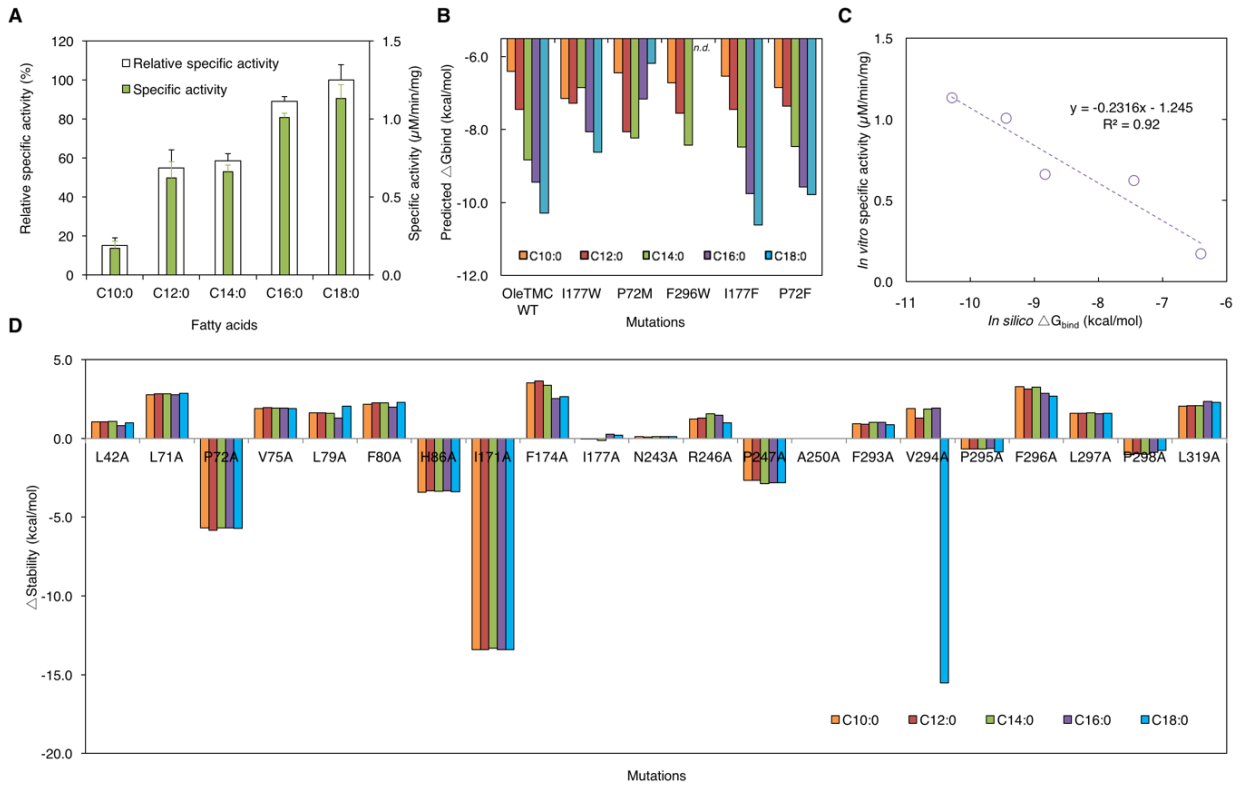

652

653

654 **FIGURE 4**

655

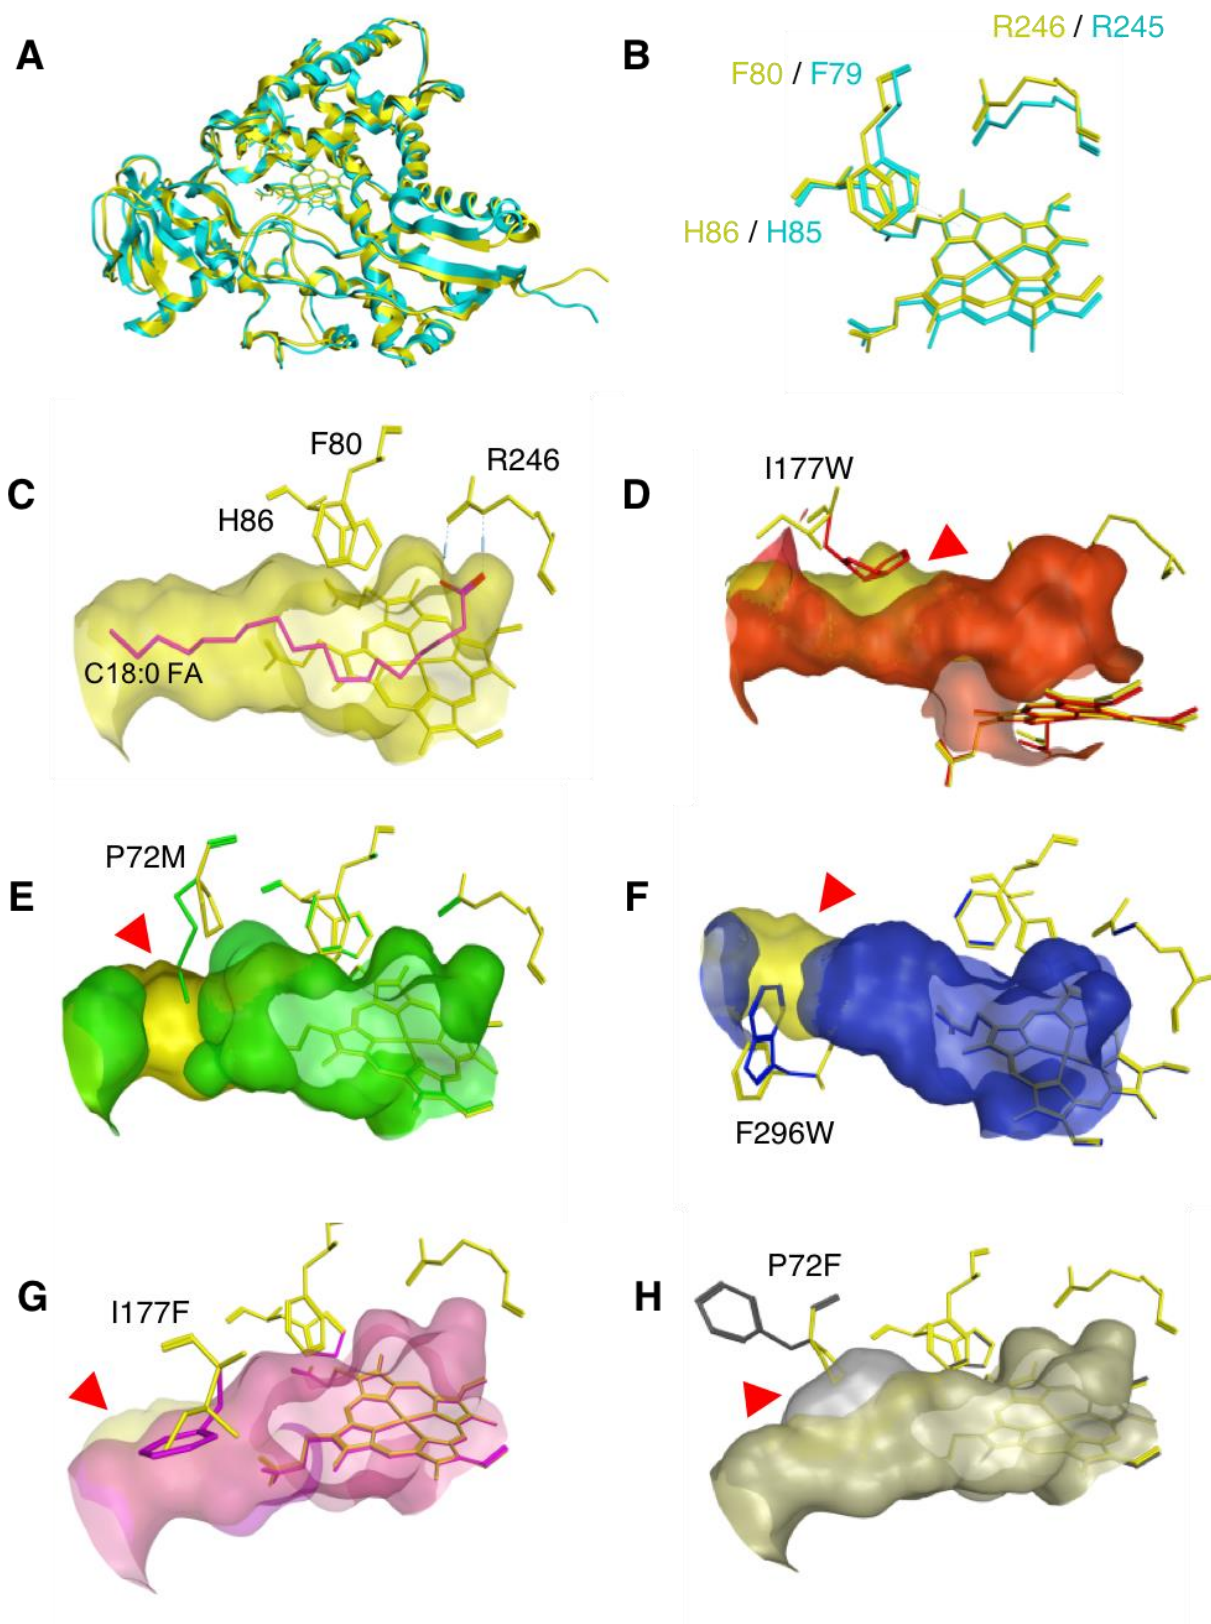

656

657 **FIGURE 5**

658

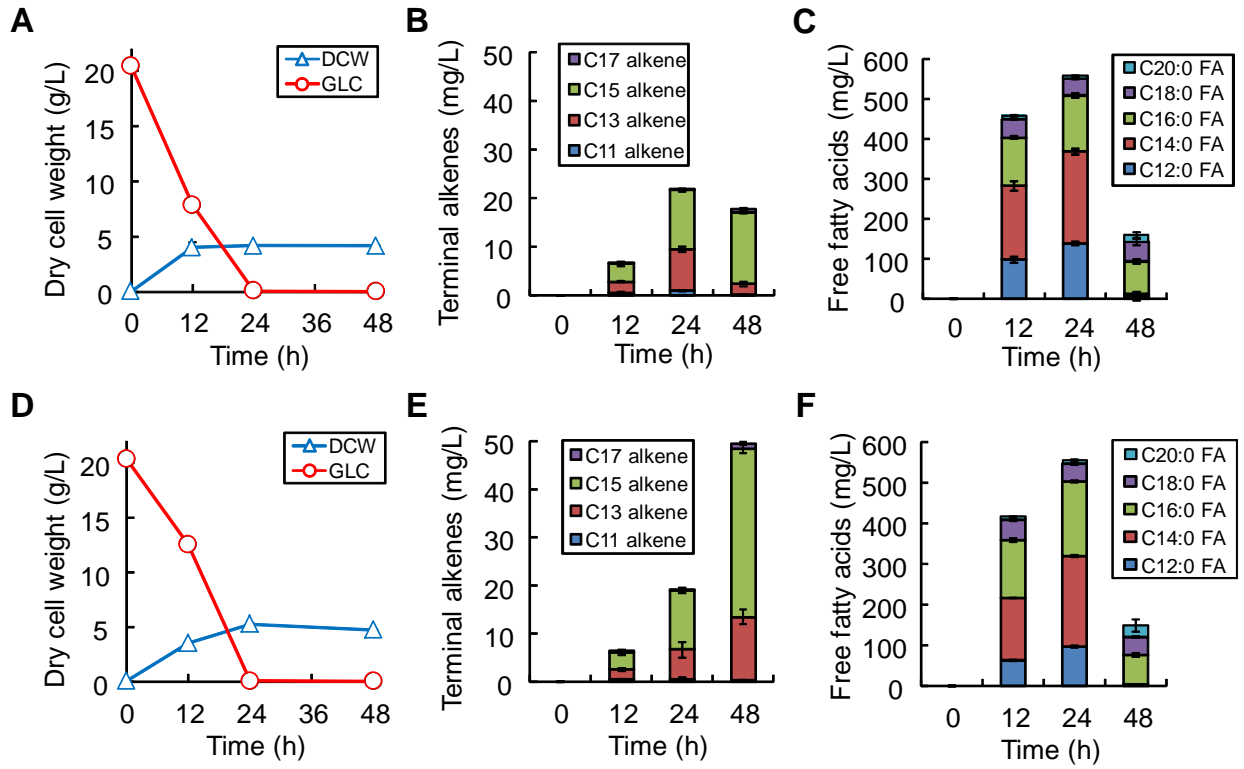

659
